# Supplementary material
Source: publisher figshare collection journal article supplement (https://tandf.figshare.com/articles/dataset/_/19703669)
Supplement: Supplementary file 1 [file 1]

## Sheet: Sheet1
	Table S1. Table summarizing the characteristics of the DNAJC5 variants in this study.
		Peri-nuclear Localization	Endolysosomal translocation	MAPS activity	Interaction with SLC3A2/CD98hc	Induction of AFSM
	WT	Yes	Yes	Yes	Yes	No
	ΔNT	Yes	Yes	Yes	Yes	NA
	ΔJ	Yes	Yes (hyperactive)	Yes (hyperactive)	Yes	Yes (mild)
	ΔLN	Reduced	Yes	Reduced	Reduced	Yes
	ΔCS	No	No	Reduced	Reduced	NA
	L115R	Reduced	Yes	Reduced	NA	Yes
	L116Δ	Reduced	Yes	Reduced	NA	Yes
